# Supplementary material
Source: HighWire-hosted journal article supplement (http://www.qdcxjkg.com/highwire/filestream/126495/field_highwire_adjunct_files/13/ERJ-00937-2015_Table_S5.pdf)
Supplement: ERJ-00937-2015_Table_S5.pdf [file ERJ-00937-2015_Table_S5.pdf]

Supplementary Table S5: Multivariate survival analyses for cell nest size

|                          |                     | <b>HR</b> | <b>lower CI (95%)</b> | <b>upper CI (95%)</b> | <b>p-value</b> |
|--------------------------|---------------------|-----------|-----------------------|-----------------------|----------------|
| <b>Age</b>               | <i>per year</i>     | 1.029     | 1.009                 | 1.048                 | 0.004          |
| <b>Sex</b>               | <i>Female</i>       | 1         |                       |                       |                |
|                          | <i>Male</i>         | 1.397     | 0.895                 | 2.182                 | 0.295          |
| <b>Stage</b>             | <i>UICC 1</i>       | 1         |                       |                       | <0.001         |
|                          | <i>UICC 2</i>       | 1.601     | 1.100                 | 2.330                 |                |
|                          | <i>UICC 3</i>       | 2.600     | 1.776                 | 3.804                 |                |
|                          | <i>UICC 4</i>       | 3.385     | 1.041                 | 11.013                |                |
| <b>Overall nest size</b> | <i>single cells</i> | 1         |                       |                       | 0.002          |
|                          | <i>&lt;5 cells</i>  | 0.715     | 0.485                 | 1.053                 |                |
|                          | <i>5-14 cells</i>   | 0.560     | 0.356                 | 0.880                 |                |
|                          | <i>≥15 cells</i>    | 0.440     | 0.284                 | 0.681                 |                |
